# Supplementary material for: Whole-Genome Sequencing of the Opportunistic Yeast Pathogen Candida inconspicua Uncovers Its Hybrid Origin
Source: Front Genet. 2019 Apr 25;10:383. doi: 10.3389/fgene.2019.00383 (PMC6494940; doi:10.3389/fgene.2019.00383)
Supplement: Supplementary file 2 [file Data_Sheet_2.xlsx]

## Sheet: Sheet1
Supplementary file2. Detailed information on the genomic patterns observed for the different C. inconspicua strains.
Candida inconspicua
Genome	CANINC
Size	10353411
GC content	0.351
			Mapping statistics			Variant Calling statistics												Heterozygous blocks								LOH blocks											nQuire general ploidy (histotest)
Strain	Other name	Library	Coverage	%reads mapped	Genome > 20 reads	Variants	PASS Variants	SNPs	PASS SNPs	Heteroz PASS SNPs	Heteroz Variant PASS	Homoz Variant PASS	PASS Variants/kb	PASS SNPSs/kb	Heteroz PASS SNPs/kb	Heteroz Variant/kb	Homoz Variant/kb	Heter Var in Heter block > 100bp	Heter Var in Heter block > 100bp (%)	Heterozygous blocks > 100bp	Heterozygous block > 100bp (average size)	Heterozygous block > 100bp (max size)	Heter region size > 100bp	Parental divergence	Heterozygous genome	LOH Blocks > 100bp	Average LOH block size	Minimum distance between LOH blocks	Maximum distance between LOH blocks	Median distance between LOH blocks	Average distance between LOH blocks	LOH nucl >100bp	LOH genome >100bp	LOH Blocks > 200bp	LOH nucl > 200bp	LOH genome > 200bp
CBS180		PE	592.193	0.9913	10260526	161354	147368	145226	134155	133982	147151	210	14.3626	13.0749	13.058	14.3415	0.0204668	116431	0.791235	10754	297.68	2683	3201264	0.0363703	0.309199	19454	346.49	2	2683	121.0	189.8747129506008	6740637	0.651055	9939	5426587	0.524135	Diploid
110_10		PE	615.154	0.9891	10241648	230902	200916	206283	183848	170222	186162	14754	19.6175	17.951	18.177	18.177	1.44059	157566	0.846392	12099	345.24	4195	4177019	0.0377221	0.403444	20112	288.16	2	4195	141.0	231.0855772206747	5795422	0.55976	8917	4265978	0.412036	Triploid
1282		PE	615.237	0.9883	10219427	240736	207320	214825	189667	176282	192966	14354	20.2869	18.5595	17.2497	18.8823	1.40458	164384	0.851881	12669	344.51	5127	4364549	0.0376635	0.421557	20841	268.57	2	5127	144.0	232.46970224188496	5597320	0.540626	8895	3967655	0.383222	Triploid
14ANR23920		PE	619.115	0.9812	10115693	243470	210123	216579	191709	134534	148345	61778	20.772	18.9516	13.2995	14.6648	6.10714	113979	0.768337	11008	286.52	2889	3154009	0.0361378	0.304635	20634	327.03	2	2889	112.0	178.51773512861737	6747918	0.651758	10650	5368622	0.518537	Diploid
9_16		PE	584.655	0.9802	10113644	241958	209306	215241	190923	133579	147317	61989	20.6954	18.8778	13.2078	14.5662	6.12924	113164	0.768167	10953	286.01	2865	3132716	0.0361233	0.302578	20531	329.94	2	2865	112.0	178.11616748320623	6774040	0.654281	10598	5401792	0.52174	Diploid
CI1		PE	570.661	0.982	10107767	239285	207634	213002	189410	129787	143050	64584	20.542	18.7391	12.8403	14.1525	6.38954	109817	0.767683	10635	285.45	2889	3035773	0.0361743	0.293215	19994	344.11	2	2889	112.0	177.52639775735867	6880180	0.664533	10375	5552342	0.536281	Diploid
CNM_CL6867		PE	589.765	0.9893	10246495	240233	204799	214669	187510	181528	198302	6497	19.9872	18.2999	17.7161	19.3532	0.63407	169808	0.85631	12800	350.26	3949	4483351	0.0378752	0.433031	20863	263.06	2	3949	146.0	237.88747082484977	5488140	0.53008	8950	3864474	0.373256	Triploid
IUM_96-0030		PE	641.058	0.9876	10241055	241190	205738	215375	188090	176101	192912	12826	20.0895	18.3663	17.1956	18.8371	1.25241	162762	0.843711	12774	338.98	3322	4330108	0.0375884	0.41823	21306	263.42	2	3322	139.0	226.15440676319113	5612492	0.542091	9474	3996133	0.385973	Triploid
LL867		PE	588.537	0.9868	10249684	241358	209403	215520	191591	185215	202506	6897	20.4302	18.6924	18.0703	19.7573	0.672899	174328	0.860854	12971	354.18	3913	4594033	0.0379466	0.443722	20939	256.83	2	3913	148.0	242.0011871197507	5377791	0.519422	8840	3728515	0.360124	Triploid
NRZ_BK_345*		PE	92.9262	0.2466	10104901	241170	205481	215729	188628	182712	199104	6377	20.3348	18.667	18.0815	19.7037	0.63108	170461	0.856141	12920	348.85	3949	4507079	0.0378207	0.435323	21080	259.24	2	3949	146.0	237.37058707837545	5464772	0.527823	9029	3820691	0.369027	Triploid
UCSC_1590		PE	692.718	0.9869	10253109	236727	206189	211437	188495	180796	197848	8341	20.1099	18.3842	17.6333	19.2964	0.813509	169049	0.854439	12898	346.48	3891	4468937	0.0378276	0.431639	21064	260.8	2	3891	145.0	234.92626818718048	5493504	0.530598	9002	3846754	0.371545	Triploid
*Strain NRZ_BK_345 revealed a low percentage of reads mapping to C. inconspicua genome assembly. A further inspection revealed the presence of a possible contamination with non-related species which allowed the cleaning of the reads. In the end a coverage close to 100bp was obtained and therefore we decided to include it in the analysis.
Jaccard metric
	LL867	UCSC_1590	NRZ_BK_345	CNM_CL6867	s110_10	s1282	IUM_96-0030	CBS180	14ANR23920	s9_16	CI1
LL867	1	0.8674	0.852024	0.810299	0.539633	0.358217	0.369859	0.309682	0.193686	0.184192	0.165721
UCSC_1590	0.8674	1	0.810323	0.766042	0.510805	0.348671	0.382336	0.31461	0.195741	0.187039	0.167332
NRZ_BK_345	0.852024	0.810323	1	0.781672	0.518154	0.344411	0.358776	0.300331	0.196297	0.188415	0.168304
CNM_CL6867	0.810299	0.766042	0.781672	1	0.512945	0.347335	0.357732	0.321046	0.202258	0.194131	0.178493
s110_10	0.539633	0.510805	0.518154	0.512945	1	0.323336	0.271708	0.279498	0.243292	0.230847	0.215884
s1282	0.358217	0.348671	0.344041	0.347335	0.321916	1	0.315299	0.272876	0.207381	0.202735	0.195914
IUM_96-0030	0.369859	0.382336	0.358776	0.357732	0.271708	0.315299	1	0.240761	0.207766	0.20843	0.188142
CBS180	0.310702	0.315633	0.300331	0.322077	0.279498	0.275427	0.241516	1	0.203231	0.200429	0.254282
14ANR23920	0.193686	0.195741	0.196297	0.202258	0.243292	0.208772	0.207766	0.203231	1	0.845953	0.728104
s9_16	0.184192	0.187039	0.188415	0.194131	0.230847	0.207529	0.20843	0.200429	0.845953	1	0.767218
CI1	0.165721	0.167332	0.168304	0.178493	0.215884	0.19773	0.188142	0.254282	0.728104	0.767218	1
LOH blocks shared between all of them				Average LOH blocks		%
>100bp	633			20620		0.0306984
>150bp	521
>200bp	483			9515		0.050762
>500bp	21
Pairwise comparison of shared LOH blocks >1000bp and scaffold minimum size = 10000bp
	LL867	UCSC_1590	NRZ_BK_345	CNM_CL6867	s110_10	s1282	IUM_96-0030	CBS180	14ANR23920	s9_16	CI1
LL867	285	224	193	204	201	65	51	74	5	5	5
UCSC_1590	224	296	193	208	192	65	63	81	5	5	5
NRZ_BK_345	193	193	290	185	174	49	43	74	8	9	8
CNM_CL6867	204	208	185	327	182	64	55	69	5	5	5
110_10	201	192	174	182	473	63	52	80	22	23	23
1282	65	65	49	64	63	350	54	73	8	8	8
IUM_96-0030	51	63	43	55	52	54	330	60	12	12	12
CBS180	74	81	74	69	80	73	60	565	5	5	5
14ANR23920	5	5	8	5	22	8	12	5	725	611	576
9_16	5	5	9	5	23	8	12	5	611	729	627
CI1	5	5	8	5	23	8	12	5	576	627	716
Pairwise comparison of shared LOH blocks >1000bp and scaffold minimum size = 10000bp (jaccard metric but for number of blocks)
	LL867	UCSC_1590	NRZ_BK_345	CNM_CL6867	s110_10	s1282	IUM_96-0030	CBS180	14ANR23920	s9_16	CI1
LL867	1	0.627451	0.505236	0.5	0.360862	0.114035	0.0904255	0.0953608	0.00497512	0.0049554	0.00502008
UCSC_1590	0.627451	1	0.491094	0.501205	0.332756	0.111876	0.111901	0.103846	0.00492126	0.00490196	0.00496524
NRZ_BK_345	0.505236	0.491094	1	0.428241	0.295416	0.0829103	0.0745234	0.0947503	0.00794439	0.00891089	0.00801603
CNM_CL6867	0.5	0.501205	0.428241	1	0.294498	0.104405	0.0913621	0.0838396	0.00477555	0.00475737	0.00481696
110_10	0.360862	0.332756	0.295416	0.294498	1	0.0828947	0.069241	0.0835073	0.0187075	0.0195081	0.0197256
1282	0.114035	0.111876	0.0829103	0.104405	0.0828947	1	0.086262	0.0866983	0.00749766	0.00746965	0.00756144
IUM_96-0030	0.0904255	0.111901	0.0745234	0.0913621	0.069241	0.086262	1	0.0718563	0.0115053	0.0114613	0.0116054
CBS180	0.0953608	0.103846	0.0947503	0.0838396	0.0835073	0.0866983	0.0718563	1	0.00389105	0.00387898	0.0039185
14ANR23920	0.00497512	0.00492126	0.00794439	0.00477555	0.0187075	0.00749766	0.0115053	0.00389105	1	0.724792	0.665896
9_16	0.0049554	0.00490196	0.00891089	0.00475737	0.0195081	0.00746965	0.0114613	0.00387898	0.724792	1	0.766504
CI1	0.00502008	0.00496524	0.00801603	0.00481696	0.0197256	0.00756144	0.0116054	0.0039185	0.665896	0.766504	1
